# Supplementary material for: A single methylation site regulates HRSV nucleocapsid architecture and replication
Source: Research Square preprint supplement (doi:10.21203/rs.3.rs-8628368/v1), 2026-02-11
Supplement: Supplementary file 1 [file fe0e4085b1377c0441519588.docx]

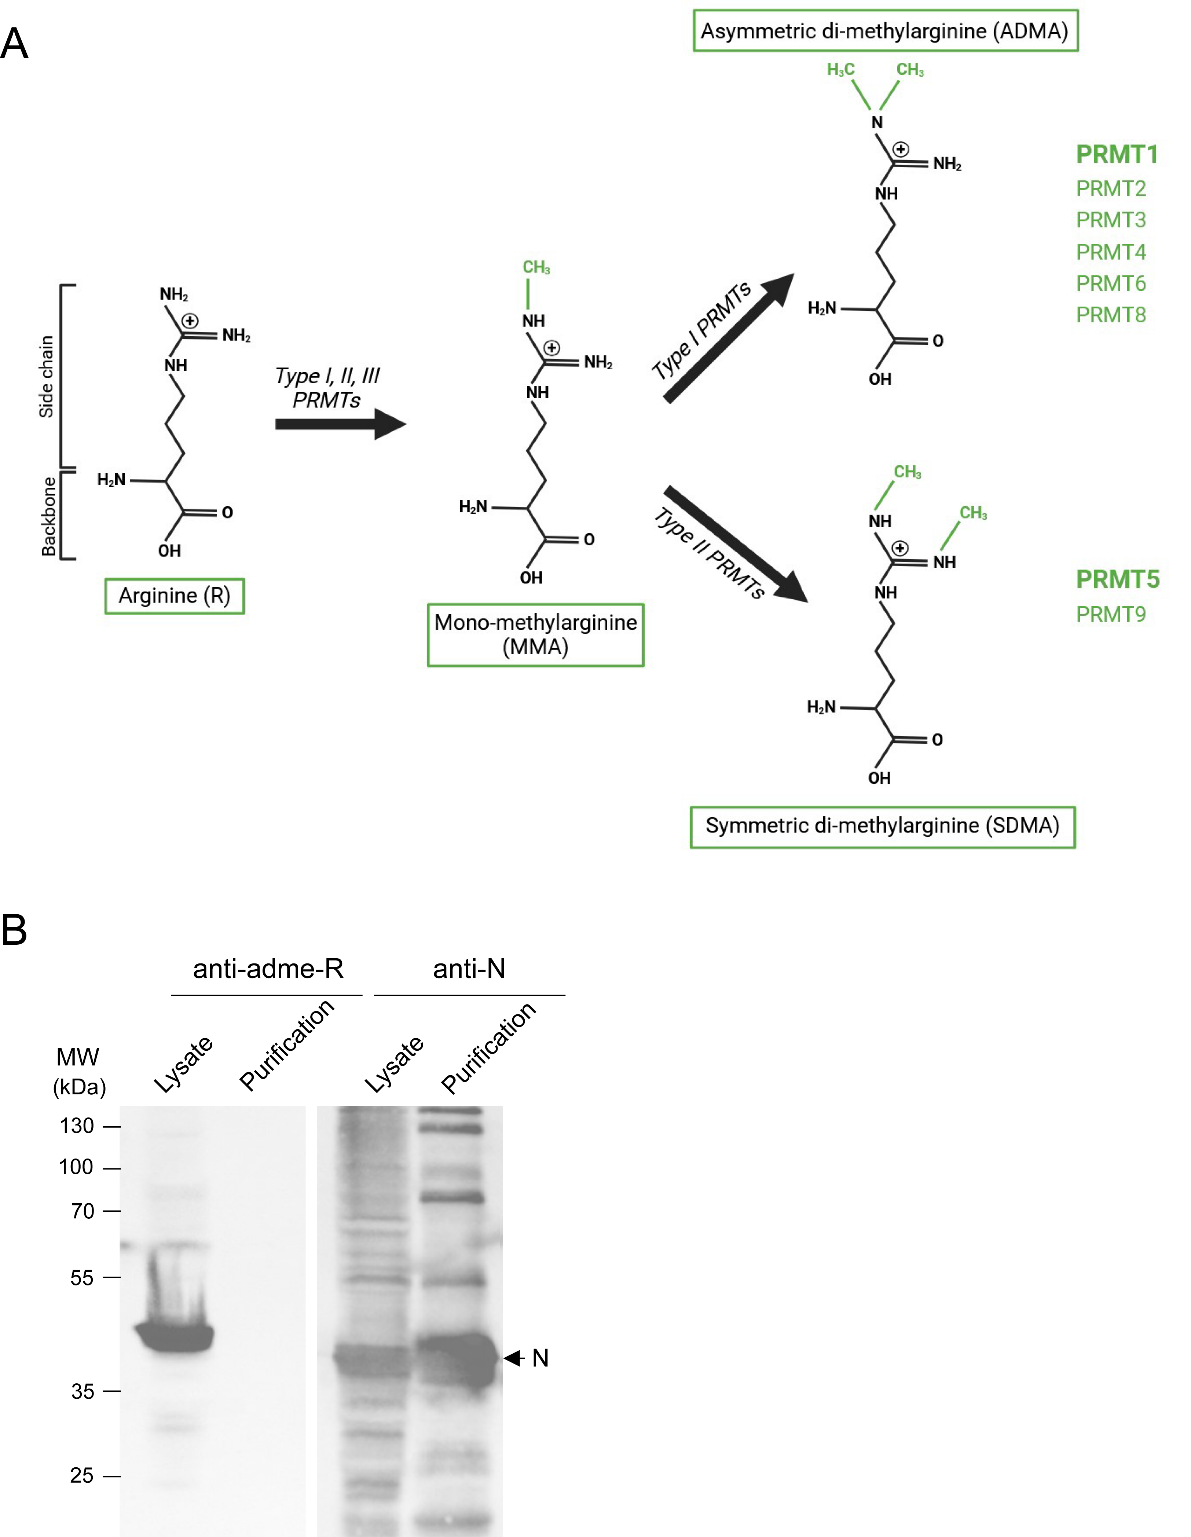


**Figure S1: Study of the nature of the arginine dimethylation of N. (A)** Schematic of the process of arginine dimethylation and of the PRMTs responsible of asymmetric and symmetric dimethylation. Added methyl groups are indicated in green. PRMT1 and 5, the most abundant PRMTs of each, type I and II PRMTs respectively, are indicated in bold. Adapted from 66 with BioRender.com. **(B)** Western blot analysis of the profile of proteins with ADMA in the lysate of High-Five cells expressing the HRSV N protein, and on corresponding purified recombinant N.


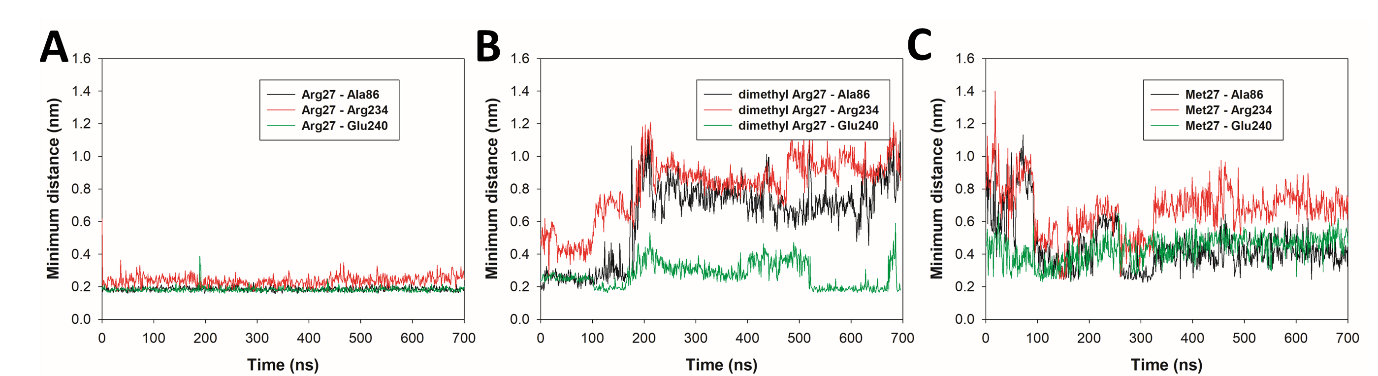


**Figure S2: Minimum distances as a function of simulation time between R27 and interacting residues** A86, R234 and E240 in unmodified R27 **(A)**, dmR27 **(B)** and R27M **(C)** systems, highlighting the disruption of key canonical interactions in dmR27 and R27M.


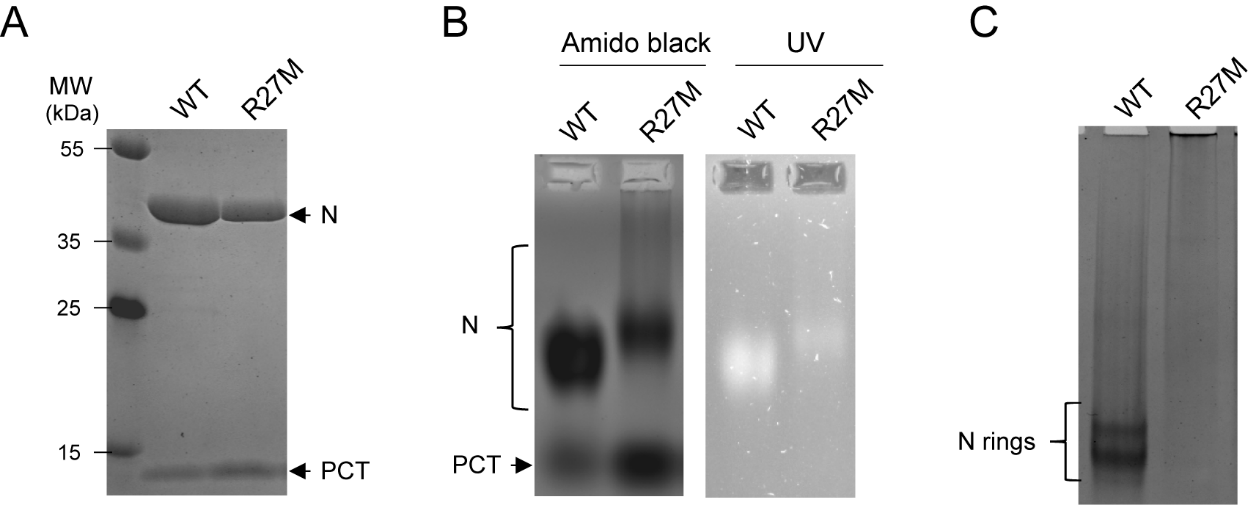


**Figure S3: Analysis of purified R27M mutant of N. (A)** Recombinant WT and R27M N proteins were expressed in *E. coli* and purified by affinity with GST-PCT. After cleavage of the GST by incubation in the presence of thrombin, the eluted samples were analysed by SDS-PAGE coloured with Coomassie blue. **(B)** Analysis of the purified proteins by migration on native agarose gel, showing a difference in migration profiles between WT and R27M proteins. Proteins were revealed by coloration with amido black, and the presence of RNA was observed by exposition of the gel to UV. **(C)** Analysis of the samples by migration on native acrylamide gel which reveals a smear for the R27M mutant, compared to the WT N that displayed the characteristic two-band pattern corresponding to the previously described 10-N and 11-N oligomers 18.


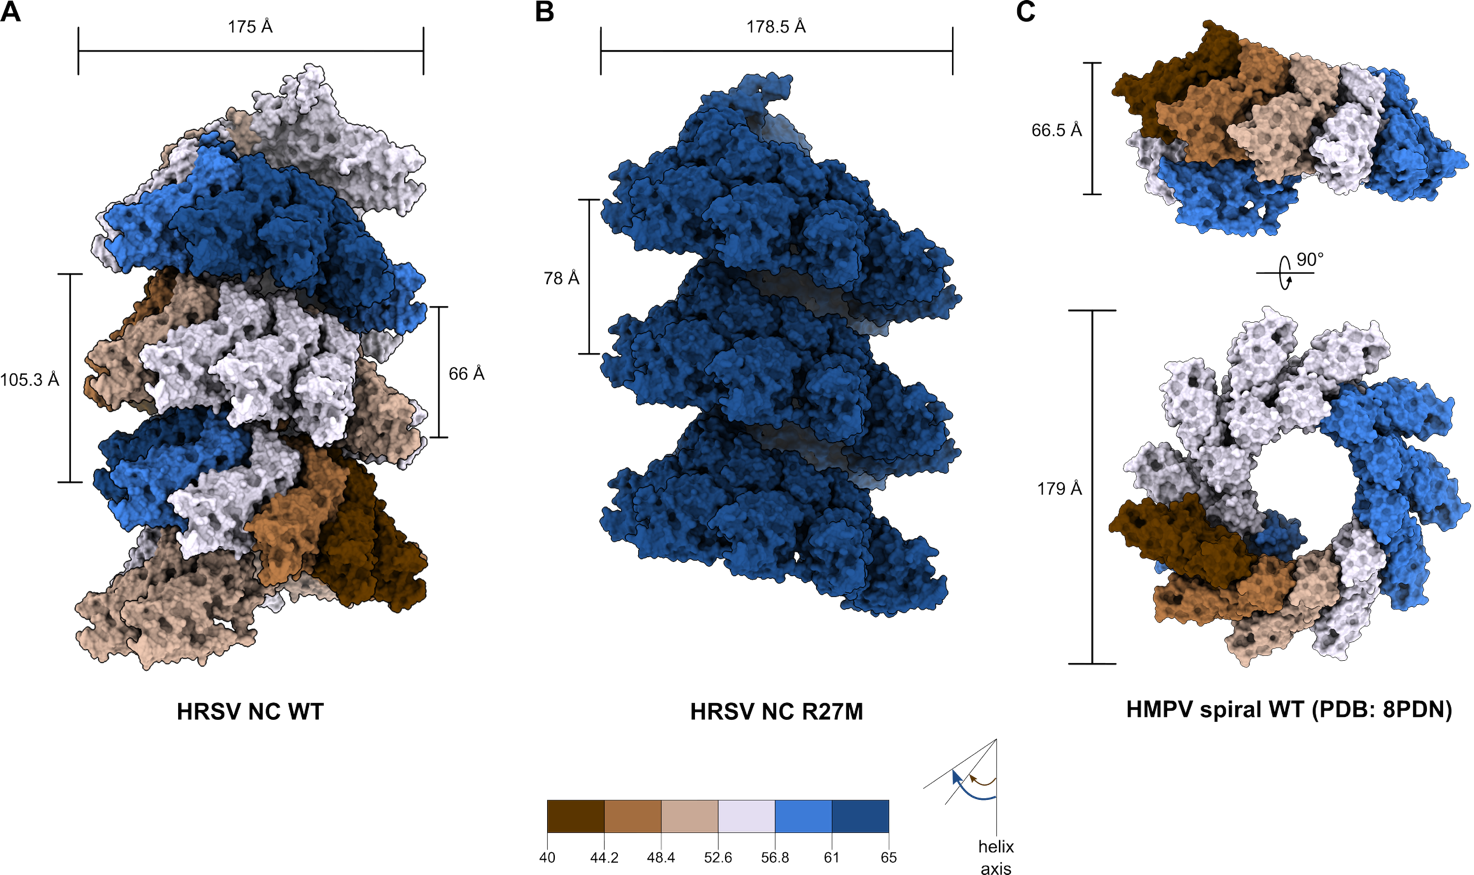


**Figure S4: Helical symmetry comparison of HRSV WT NC, HRSV R27M NC and HPMV WT spiral. (A)** Atomic model of the HRSV WT NC displayed as a surface. At the top, the NC diameter is indicated. On the left side, the size of one asymmetric unit (16 protomers) is indicated and on the right the helical-pseudo-pitch size is indicated. **(B)** Same as **A** but for HRSV R27M NC. At the top, the NC diameter is indicated. On the left side, the helical-pitch size is indicated. **(C)** Same as **A** but for HMPV WT spiral (PDB: 8PDN). On the left-top side, the helical-pseudo-pitch size is indicated. On the left-bottom side, the diameter of the spiral is indicated. Protomers are coloured depending on their axial tilt, the colour code is indicated at the bottom of the figure.


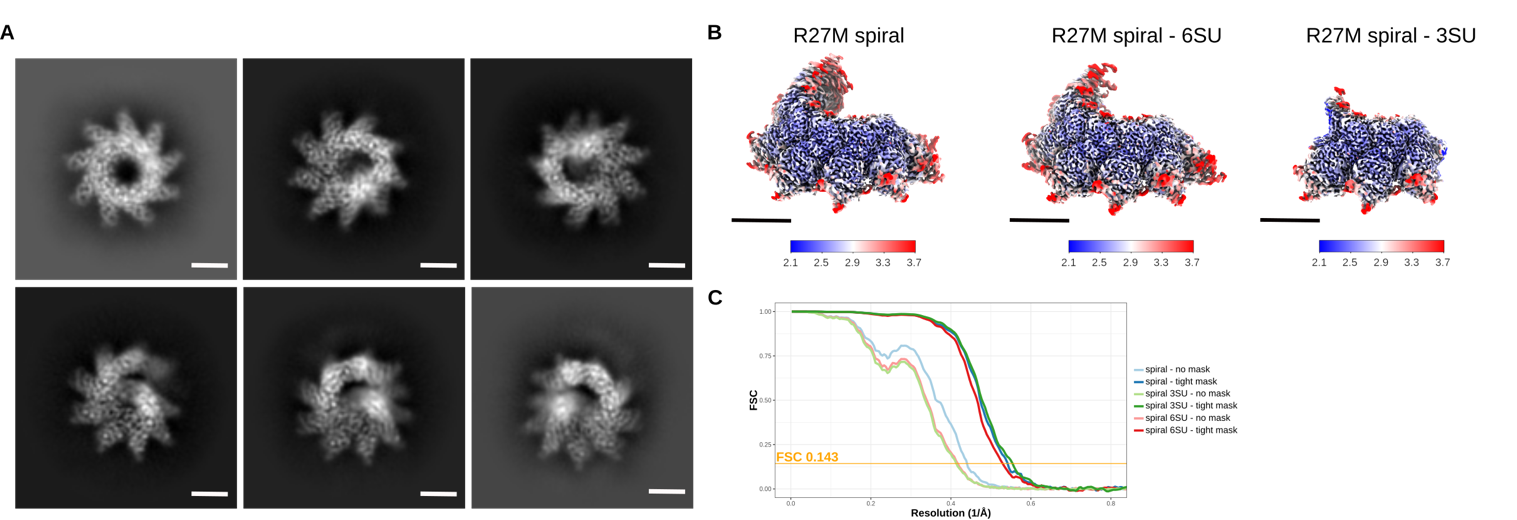


**Figure S5: Additional information on cryo-EM analysis of R27M NC spirals. (A)** Representative 2D class averages (top and tilted views). Scale bars, 50 Å. **(B)** Cryo-EM maps of the spiral and its six- and three-protomer subsections filtered and coloured by local resolution (in Å). Contour levels used in ChimeraX to generate the full views are 0.0925 (spiral), 0.08 (6SU subsection) and 0.095 (3SU subsection). Scale bars 50 Å. **(C)** FSC curves. Orange line represents FSC=0.143.


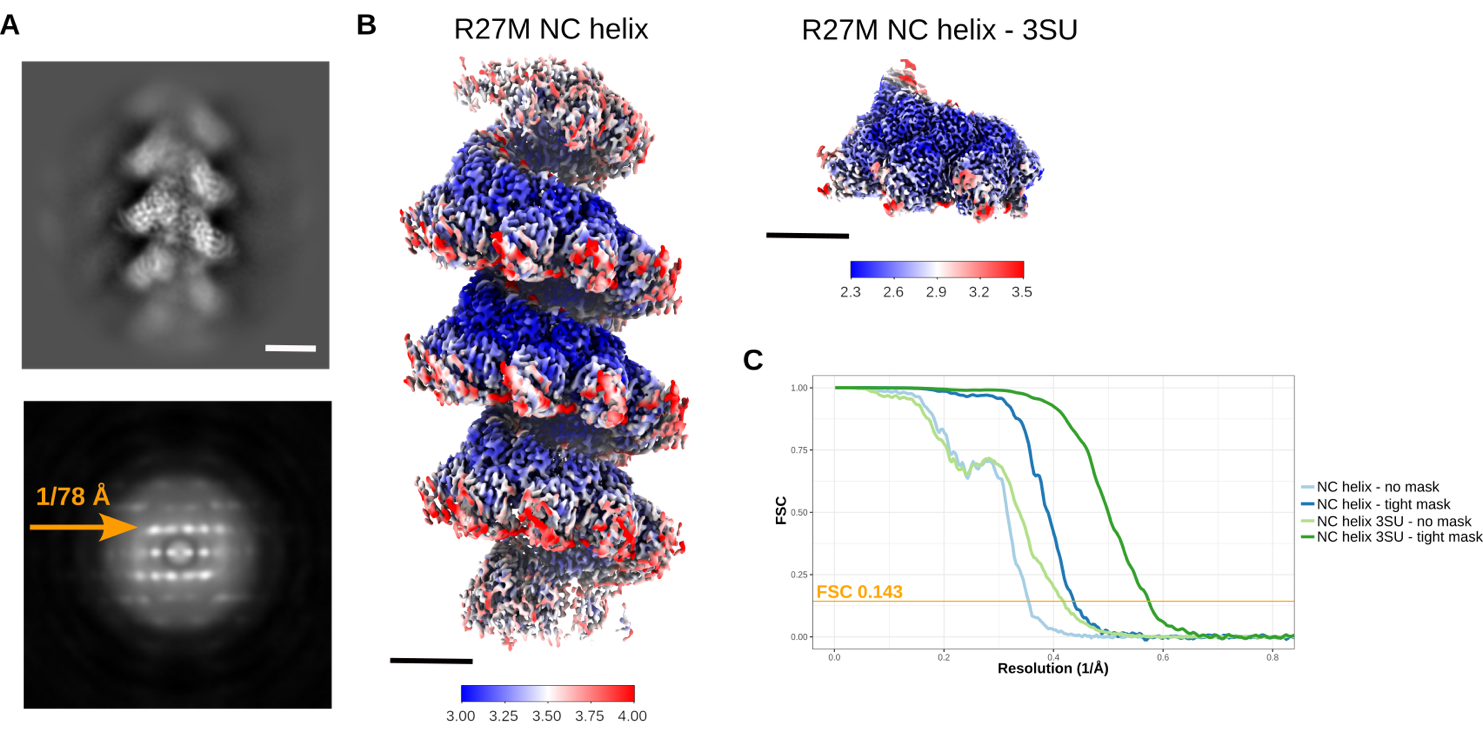


**Figure S6: Additional information on cryo-EM analysis of R27M NC helices. (A)** Representative 2D class average (top) of the R27M NC helix and an average of the PS of the particles in this class (bottom), showing a layer-line with the maximum close to the meridian at 1/78 Å. **(B)** Cryo-EM maps of the R27M NC helix and its three-protomer subsection filtered and coloured by local resolution (in Å). Contour levels used in ChimeraX to generate the full views are 0.055 and 0.10, respectively. Scale bars 50 Å. **(C)** FSC curves. Orange line represents FSC=0.143.


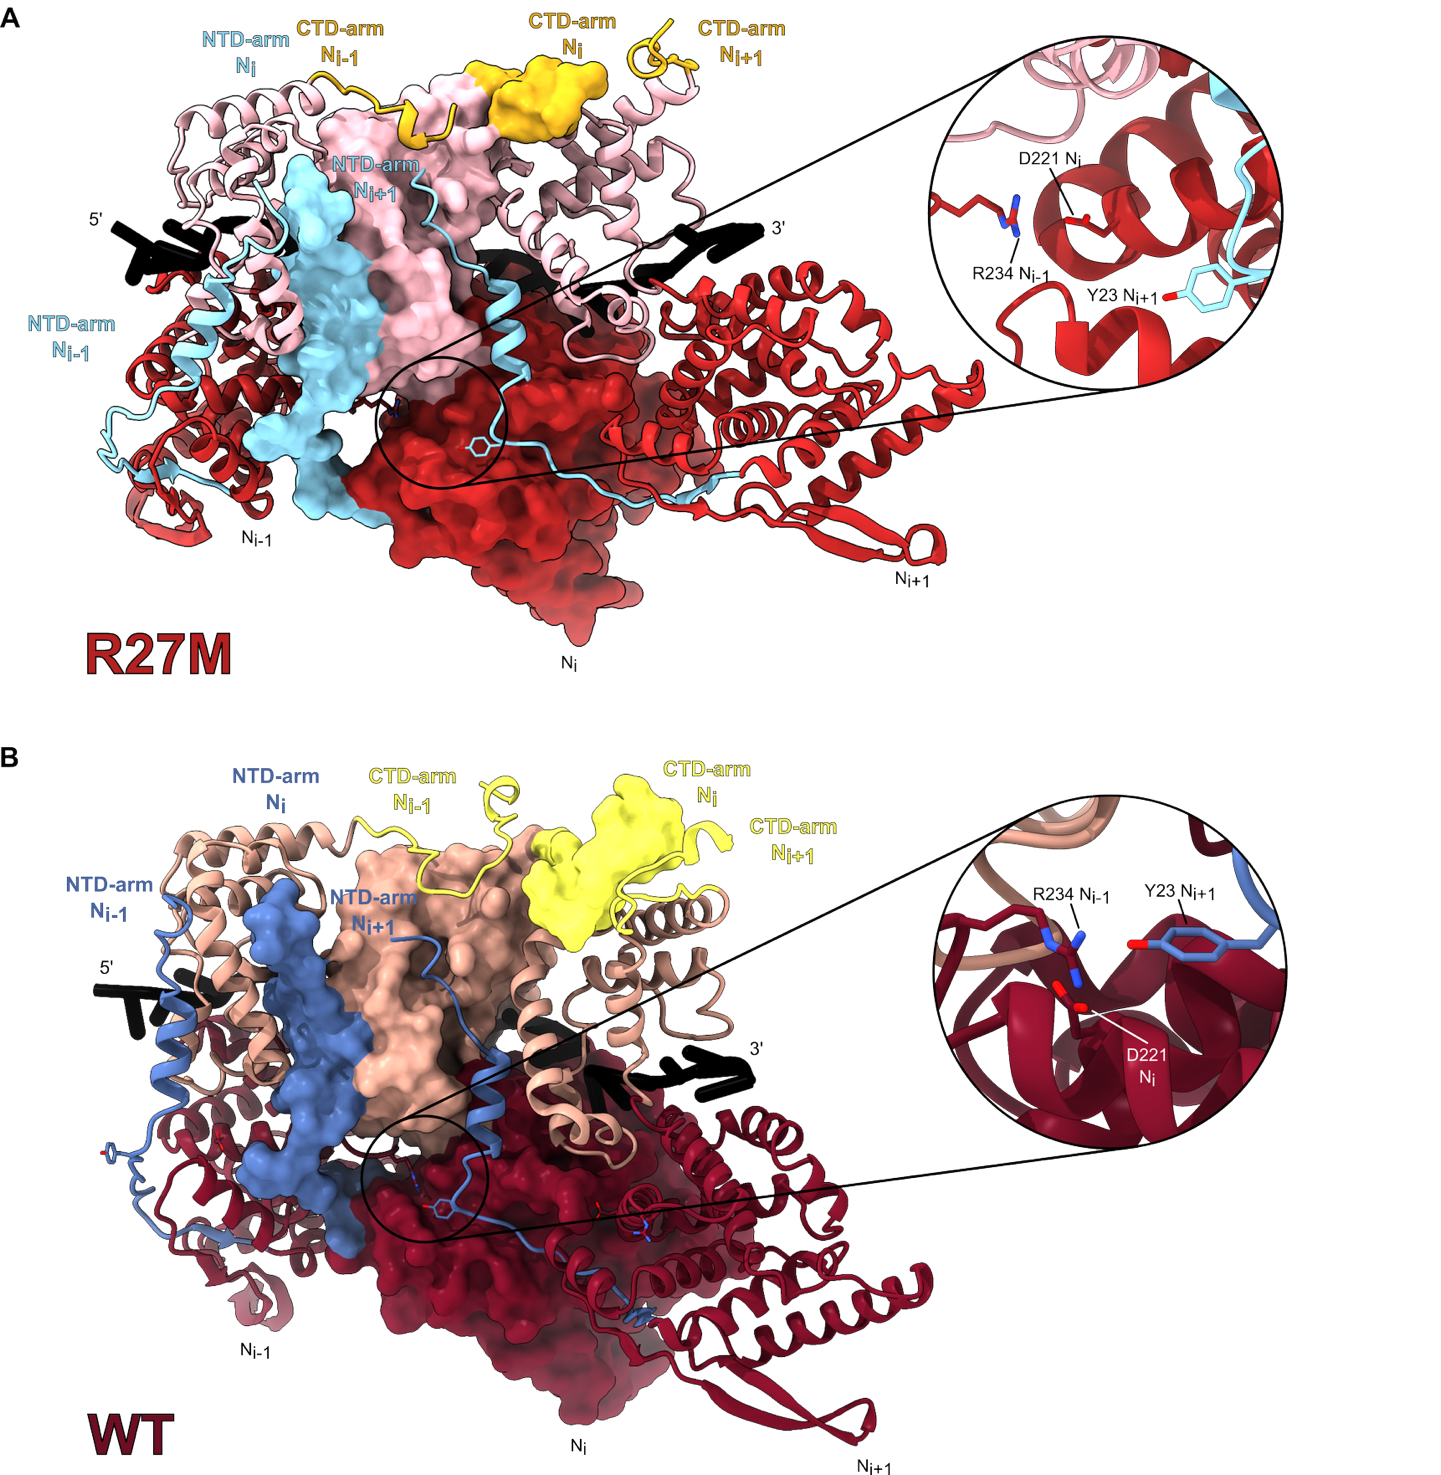


**Figure S7. Lateral interactions (N-hole) between N protomers in HRSV R27M NC and HRSV WT N10 double rings.** **(A)** Atomic models of three consecutive HRSV R27M NC protomers are shown, as ribbons on the edge and as surface for the middle one. The close-up of the N-hole shows the absence of tripartite interaction between Y23 and D221-R234. **(B)** Same as **A** butfor the three protomers from HRSV WT N10 double rings (PDB: 8OOU). The close-up of the N-hole shows the tripartite interaction between Y23-D221-R234. The NTD-arms, NTD, CTD and CTD-arms are coloured as in Figures 1, 5 and 6.

**Table 1: Modified peptides identified by LC-MS/MS.**

| **N purified from** | **PTM*** | **Peptide sequence** | **-10logP**** |
| --- | --- | --- | --- |
| HEp-2 HRSV-infected cells | Phosphorylation | DQLLS**S20**SK | 37.12 |
| Dimethylation | YTIQ**R27**STGDSIDTPNYDVQK | 93.58 |
| Phosphorylation | **S28**TGDSIDTPNYDVQK | 48.24 |
| Phosphorylation | STGD**S32**IDTPNYDVQK | 56.90 |
| Phosphorylation | STGDSIDTPN**Y38**DVQKHINK | 43.66 |
| Hi5 cells (Baculovirus expression system) | Phosphorylation | AL**S4**KVKLN | 23.61 |
| Phosphorylation | ALSKVKLND**T11**LNK | 29.46 |
| Phosphorylation | DQLLS**S20**SKYTIQRSTG | 28.46 |
| Dimethylation | DQLLSSSKYTIQ**R27**STG | 33.38 |
| Phosphorylation | TIQRSTGDSIDTPN**Y38**DVQKHINKL | 16.37 |

*****Mass weight gain (Da): Phosphorylation (+79.97); Dimethylation: (+28.03)

******Peaks software score (-10logP)

**Table S1: LC/MS-MS analysis of the N protein purified from infected cells, and of the di-methylated peptide**

| **Sequence coveragea** | | | |
| --- | --- | --- | --- |
| MALSKVKLNDTLNKDQLLSSSKYTIQRSTGDSIDTPNYDVQKHINKLCGMLLITEDANHKFTGLIGMLYAMSRLGREDTIKILRDAGYHVKANGVDVTTHRQDINGKEMKFEVLTLASLTTEIQINIEIESRKSYKKMLKEMGEVAPEYRHDSPDCGMIILCIAALVITKLAAGDRSGLTAVIRRANNVLKNEMKRYKGLLPKDIANSFYEVFEKHPHFIDVFVHFGIAQSSTRGGSRVEGIFAGLFMNAYGAGQVMLRWGVLAKSVKNIMLGHASVQAEMEQVVEVYEYAQKLGGEAGFYHILNNPKASLLSLTQFPHFSSVVLGNAAGLGIMGEYRGTPRNQDLYDAAKAYAEQLKENGVINYSVLDLTAEELEAIKHQLNPKDNDVEL | | | |
| **Peptides m/z of YTIQRSTGDSIDTPNYDVQK peptideb** | | | |
| **N-Cα bond** | | **Peptide bond** | |
| **z-ions** | **c-ions** | **y-ions** | **b-ions** |
| z'2 = 259.1535 Da  z’3 = 358.2240 Da  z’4 = 473.2483 Da  z’8 = 948.4567 Da | c8 = 1009.5312 Da  c10 = 1268.6111 Da  c11 = 1381.6951 Da  c12 = 1496.7262 Da  c15 = 1808.8655 Da  c16 = 1971.93 Da | y4 = 489.2736 Da  y7 = 863.4293 Da  y8 = 964.4770 Da  y9 = 1079.5076 Da  y10 = 1192.5916 Da | b13 = 1580.7588 Da |

a Sequence coverage (99%) indicated in grey on the sequence of HRSV N.

b Ions indicated on the LC-MS/MS spectrum of Figure 1C.

**Table S2. Cryo-EM data collection, refinement and validation statistics**

| **Name of the map** | **R27M NC spiral** | **R27M NC spiral – 3SU** | **R27M NC helix** | **R27M NC helix – 3SU** |
| --- | --- | --- | --- | --- |
| **EMDB**  **PDB** | **EMD-56158** | **EMD-56160** | **EMD-56157**  **PDB: 9TR8** | **EMD-56148**  **PDB: 9TQF** |
| **Data collection and processing** |  |  |  |  |
| Magnification |  | 165,000 |  |  |
| Voltage (kV) |  | 300 |  |  |
| Total dose (e-/Å2) |  | 41 |  |  |
| Defocus range (µm) |  | -0.8 to -2.2 |  |  |
| Pixel size (Å) |  | 0.729 |  |  |
| Symmetry imposed | C1 | C1 | Helical  -40.141° 8.677 Å | C1 |
| Initial particles images (no.) | 2,256,397 | - | 1,967,024 | - |
| Final particles images (no.) | 312,385 | 312,385 | 938,469 | 938,469 |
| Map resolution (Å) | 2.53 | 2.48 | 3.14 | 2.39 |
| FSC threshold | 0.143 | 0.143 | 0.143 | 0.143 |
| Map resolution  range (Å) | 2.1-3.7 | 2.1-3.7 | 3-4 | 2.3-3.5 |
| **Refinement** |  |  |  |  |
| Initial model used (PDB code) | - | - | 8OP1 | 8OP1 |
| Map sharpening B-factor (Å2) | -69.7 | -65.1 | -75.9 | -64.7 |
| **Model composition** |  |  |  |  |
| Non-hydrogen atoms | - | - | 77325 | 9279 |
| Protein residues | - | - | 9225 | 1107 |
| ‍Nucleotides | - | - | 175 | 21 |
| B-factor protein (Å2) | - | - | 38.83 | 38.83 |
| ‍B-factor nucleotide (Å2) | - | - | 20.92 | 17.43 |
| ‍CCbox, CCmask, CCvolume |  |  | 0.74, 0.81, 0.81 | 0.56, 0.80, 0.75 |
| **R.m.s. deviations** |  |  |  |  |
| Bond lengths (Å) | - | - | 0.010 | 0.010 |
| ‍Bond angles (°) | - | - | 1.500 | 1.498 |
| **‍Validation** |  |  |  |  |
| ‍Molprobity score | - | - | 1.66 | 1.65 |
| ‍Clashscore | - | - | 7.90 | 7.51 |
| ‍Rotamer outliers (%) | - | - | 0.65 | 0.65 |
| ‍**Ramachandran plot** |  |  |  |  |
| ‍Favored (%) | - | - | 96.46 | 96.46 |
| ‍Allowed (%) | - | - | 3.54 | 3.54 |
| ‍Outliers (%) | - | - | 0 | 0 |
